# Supplementary material for: Restless Legs Syndrome-associated intronic common variant in Meis1 alters enhancer function in the developing telencephalon
Source: HighWire-hosted journal article supplement (doi:10.1101/gr.166751.113), 2014-03-18
Supplement: Supplemental_Table_4.xlsx [file Supplemental_Table_4.xlsx]

## Sheet: forebrain E12.5
	Illumina ID	Gene symbol	Gene name
	ILMN_1259344	Prap1	proline-rich acidic protein 1	D
	ILMN_2701379	Cblb	Casitas B-lineage lymphoma b
	ILMN_1255561	Hspa5	heat shock protein 5
	ILMN_2640718	Nudt3	nudix (nucleotide diphosphate linked moiety X)-type motif 3
	ILMN_1226081	Harbi1	harbinger transposase derived 1
	ILMN_1219538	Fut11	fucosyltransferase 11
	ILMN_2645737	Nr1i2	nuclear receptor subfamily 1, group I, member 2
	ILMN_2874291	Amy2	amylase 2a5
	ILMN_2858266	4930526D03Rik
	ILMN_1220377	Hbs1l	Hbs1-like
	ILMN_2731191	Klk1b5	kallikrein 1-related peptidase b5
	ILMN_2709557	1700128F08Rik
	ILMN_1256750	Serpinb3d	serine (or cysteine) peptidase inhibitor, clade B, member 3D
	ILMN_2737878	Cab39	calcium binding protein 39
	ILMN_1245593	Naalad2	N-acetylated alpha-linked acidic dipeptidase 2
	ILMN_2680136	Ifi44	interferon-induced protein 44
	ILMN_3112023	Tdpoz3	TD and POZ domain containing 3
	ILMN_3067105	Grik1	glutamate receptor, ionotropic, kainate 1
	ILMN_2621101	Csn2	casein beta
	ILMN_2741123	Snap25	synaptosomal-associated protein 25
	ILMN_1233670	Nr4a3	nuclear receptor subfamily 4, group A, member 3
	ILMN_2602350	Unkl	unkempt-like
	ILMN_2821710	Gm648
	ILMN_2601488	Ccnl2	cyclin L2
	ILMN_1218241	Slc9a3r2	solute carrier family 9, member 3 regulator 2
	ILMN_3163514	Orc1l	origin recognition complex, subunit 1
	ILMN_1223052	Rpl37	ribosomal protein L37
	ILMN_1221331	Peg12	paternally expressed 12
	ILMN_1227899	Ppp3ca	protein phosphatase 3, catalytic subunit, alpha isoform
	ILMN_1228696	Ada	adenosine deaminase
	ILMN_2975382	Rilp	Rab interacting lysosomal protein
	ILMN_2853212	Spns1	spinster homolog 1
	ILMN_2708319	Fbxw11	F-box and WD-40 domain protein 11
	ILMN_2432873	Ube2v2	ubiquitin-conjugating enzyme E2 variant 2
	ILMN_3163399	Cyp4x1	cytochrome P450, family 4, subfamily x, polypeptide 1
	ILMN_1232267	Olfr197	olfactory receptor 197
	ILMN_2901576	Vmn1r90	vomeronasal 1 receptor 90
	ILMN_2746021	Itgb3bp	integrin beta 3 binding protein
	ILMN_2723474	Adcy9	adenylate cyclase 9
	ILMN_2625377	Rgs1	regulator of G-protein signaling 1
	ILMN_3078388	Cd209b	CD209b antigen
	ILMN_2996973	Gm4841
	ILMN_1240473	V1rc26	vomeronasal 1 receptor, C26
	ILMN_2965612	Abca6	ATP-binding cassette, sub-family A (ABC1), member 6
	ILMN_3101073	Masp2	mannan-binding lectin serine peptidase 2
	ILMN_1252548	Ugt1a2	UDP glucuronosyltransferase 1 family, polypeptide A2
	ILMN_2701712	Plcxd3	phosphatidylinositol-specific phospholipase C, X domain containing 3
	ILMN_2627244	Bai2	brain-specific angiogenesis inhibitor 2
	ILMN_2470646	Wt1	Wilms tumor 1 homolog
	ILMN_2617646	Olfr1145	olfactory receptor 1145
	ILMN_2723072	B230120H23Rik
	ILMN_2874777	Fam161a	family with sequence similarity 161, member A
	ILMN_2694907	Myl1	myosin, light polypeptide 1	C
	ILMN_1245533	BC002059
	ILMN_2674951	Otof	otoferlin
	ILMN_1258410	Hoxa3	homeo box A3
	ILMN_2803156	Ppp1r2-ps9	protein phosphatase 1, regulatory (inhibitor) subunit 2, pseudogene 9
	ILMN_3136397	EG630579	zinc finger protein 80
	ILMN_3094228	Plcxd1	phosphatidylinositol-specific phospholipase C, X domain containing 1
	ILMN_2590680	Zfp697	zinc finger protein 697
	ILMN_1252131	Klk1b27	kallikrein 1-related peptidase b27
	ILMN_1251046	Dmrtc1a	DMRT-like family C1a
	ILMN_2672379	Ptbp2	polypyrimidine tract binding protein 2
	ILMN_2588346	Ifitm10	interferon induced transmembrane protein 10
	ILMN_2744737	Npas3	neuronal PAS domain protein 3
	ILMN_2742057	Gyk	glycerol kinase
	ILMN_1247352	Dmgdh	dimethylglycine dehydrogenase precursor
	ILMN_1237871	Ampd1	adenosine monophosphate deaminase 1
	ILMN_2714749	Folh1	folate hydrolase
	ILMN_2589291	Tiparp	TCDD-inducible poly(ADP-ribose) polymerase
	ILMN_2619885	Hells	helicase, lymphoid specific
	ILMN_2758509	Abcb11	ATP-binding cassette, sub-family B (MDR/TAP), member 11
	ILMN_3015028	Ott	ovary testis transcribed
	ILMN_2590722	Eif5b	eukaryotic translation initiation factor 5B
	ILMN_1239876	Xrn2	5'-3' exoribonuclease 2
	ILMN_2640752	Ces1	carboxylesterase 1
	ILMN_2754346	Eif1ay	eukaryotic translation initiation factor 1A, Y-linked
	ILMN_1242273	Gga3	golgi associated, gamma adaptin ear containing, ARF binding protein 3
	ILMN_1252913	Wwox	WW domain-containing oxidoreductase
	ILMN_3014529	2610042L04Rik
	ILMN_2728879	Abcg2	ATP-binding cassette, sub-family G (WHITE), member 2
	ILMN_2865744	Myh1	myosin, heavy polypeptide 1
	ILMN_3162205	A130090K04Rik	interaction protein for cytohesin exchange factors 1
	ILMN_2857997	Bmx	BMX non-receptor tyrosine kinase	B
	ILMN_2640789	Sgk3	serum/glucocorticoid regulated kinase 3
	ILMN_2670613	Slc25a27	solute carrier family 25, member 27
	ILMN_2689632	Azi2	5-azacytidine induced gene 2
	ILMN_2829457	Ncf1	neutrophil cytosolic factor 1
	ILMN_1219796	A4gnt	alpha-1,4-N-acetylglucosaminyltransferase
	ILMN_2789964	Olfr699	olfactory receptor 699
	ILMN_2631251	Dhrs9	dehydrogenase/reductase (SDR family) member 9
	ILMN_2888110	Wars2	tryptophanyl tRNA synthetase 2 (mitochondrial)
	ILMN_3160435	Olfr1148	olfactory receptor 1148
	ILMN_2752720	Gm5077
	ILMN_1221409	Olfr705	olfactory receptor 705
	ILMN_2772470	Adam3	a disintegrin and metallopeptidase domain 3
	ILMN_2451520	Usp8	ubiquitin specific peptidase 8
	ILMN_1242661	Itgb2	integrin beta 2
	ILMN_2700945	Rnf111	ring finger 111
	ILMN_3029509	Crygn	crystallin, gamma N
	ILMN_1251399	Stk22a	testis-specific serine kinase 1
	ILMN_2760272	Rorc	RAR-related orphan receptor gamma
	ILMN_2650902	Inca1	inhibitor of CDK, cyclin A1 interacting protein 1
	ILMN_3161002	Gm5478
	ILMN_2638674	Actl9	actin-like 9
	ILMN_2638598	Mcm8	minichromosome maintenance deficient 8
	ILMN_2886742	Plagl1	pleiomorphic adenoma gene-like 1
	ILMN_2653132	Clec7a	C-type lectin domain family 7, member a
	ILMN_2654075	Stil	Scl/Tal1 interrupting locus
	ILMN_1226741	Krtap16-5	keratin associated protein 16-5
	ILMN_1226518	Gprc2a-rs5	vomeronasal 2, receptor, pseudogene 54
	ILMN_2999158	Fggy	FGGY carbohydrate kinase domain containing
	ILMN_1256246	Efhd2	EF hand domain containing 2
	ILMN_2643547	Mphosph10	M-phase phosphoprotein 10	A
	ILMN_1219326	Calm4	calmodulin 4
	ILMN_3003124	Capn11	calpain 11
	ILMN_2723965	Edn2	endothelin 2
	ILMN_2612278	Aicda	activation-induced cytidine deaminase
	ILMN_3059046	Hcrtr1	hypocretin (orexin) receptor 1
	ILMN_1237399	Rit2	Ras-like without CAAX 2
	ILMN_1216446	Slc5a4b	solute carrier family 5, member 4b
	ILMN_2703302	2810004N23Rik
	ILMN_2756613	Adam8	a disintegrin and metallopeptidase domain 8
	ILMN_1242557	Trpc7	transient receptor potential cation channel, subfamily C, member 7
	ILMN_1218914	Rbp7	retinol binding protein 7, cellular
	ILMN_2836006	Map3k12	mitogen-activated protein kinase kinase kinase 12
	ILMN_1225141	Ptgds2	prostaglandin D2 synthase 2, hematopoietic
	ILMN_2416413	Ube3a	ubiquitin protein ligase E3A
	ILMN_2661939	Tcea1	transcription elongation factor A (SII) 1
	ILMN_2711743	Cst10	cystatin 10
	ILMN_2603001	BC057170	guanylate-binding protein 9
	ILMN_2877029	4Cytl1	cytokine-like 1
	ILMN_2755826	Olfr399	olfactory receptor 399
	ILMN_2737685	Mmp13	matrix metallopeptidase 13
	ILMN_2843958	Olfr1215	olfactory receptor 1215
	ILMN_2676925	Idua	iduronidase, alpha-L-
	ILMN_2731377	Clca1	chloride channel calcium activated 1
	ILMN_2666519	Golga7	golgi autoantigen, golgin subfamily a, 7
	ILMN_2953513	Aldh3b1	aldehyde dehydrogenase 3 family, member B1
	ILMN_2915898	Cabp2	calcium binding protein 2
	ILMN_1216836	Tmem260	transmembrane protein 260
	ILMN_2859377	Mapk15	mitogen-activated protein kinase 15
	ILMN_2752371	Itih5	inter-alpha (globulin) inhibitor H5
	ILMN_2764250	Ccdc116	coiled-coil domain containing 116
	ILMN_2710648	Fndc9	fibronectin type III domain containing 9
	ILMN_2754626	Odf2l	outer dense fiber of sperm tails 2-like
	ILMN_2679522	Wdr16	WD repeat domain 16
	ILMN_2774896	Dppa5a	developmental pluripotency associated 5A
	ILMN_2639674	Pcsk2	proprotein convertase subtilisin/kexin type 2
	ILMN_2661366	Tmem45b	transmembrane protein 45b
	ILMN_1253932	Nwd1	NACHT and WD repeat domain containing 1
	ILMN_2867343	Slc9a10	solute carrier family 9, member 10
	ILMN_2685120	Dpep3	dipeptidase 3
	ILMN_2594699	Olfr923	olfactory receptor 923
	ILMN_2636528	Nrxn1	neurexin I
	ILMN_2753173	Cend1	cell cycle exit and neuronal differentiation 1
	ILMN_2874399	Dgkk	diacylglycerol kinase kappa
	ILMN_2740337	Snx15	sorting nexin 15
	ILMN_2599233	Scrg1	scrapie responsive gene 1
	ILMN_2840985	St6galnac5	ST6-N-acetylgalactosaminide alpha-2,6-sialyltransferase 5
	ILMN_2645399	Slc16a7	solute carrier family 16, member 7
	ILMN_1253304	Stmn2	stathmin-like 2
	ILMN_2684397	Lrrc24	leucine rich repeat containing 24
	ILMN_2677569	Fam155a	family with sequence similarity 155, member A
	ILMN_1247423	Olfr107	olfactory receptor 107
	ILMN_2620374	Hhipl2	hedgehog interacting protein-like 2
	ILMN_2624301	Irx6	Iroquois related homeobox 6
	ILMN_2687602	Pou2f2	POU domain, class 2, transcription factor 2
	ILMN_1249766	Gbx2	gastrulation brain homeobox 2
	ILMN_2615071	Dok5	docking protein 5
	ILMN_2438724	Vsnl1	visinin-like 1
	ILMN_2740306	Iqsec3	IQ motif and Sec7 domain 3
	ILMN_2746218	1700018F24Rik
	ILMN_2740020	Mapt	microtubule-associated protein tau
	ILMN_1213495	Sv2a	synaptic vesicle glycoprotein 2 a
	ILMN_2659503	Cdh13	cadherin 13
	ILMN_2838501	Slc24a3	solute carrier family 24, member 3
	ILMN_2459045	Flywch1	FLYWCH-type zinc finger 1
	ILMN_2655905	Nrn1l	neuritin 1-like
	ILMN_2691522	Tfpi	tissue factor pathway inhibitor
	ILMN_2747364	Zfp804a	zinc finger protein 804A
	ILMN_2967302	Gm14092
	ILMN_1214661	Olfr32	olfactory receptor 32
	ILMN_2516844	V1ri9	vomeronasal 1 receptor, I9
	ILMN_1240699	Phkb	phosphorylase kinase beta
	ILMN_1229726	Fibcd1	fibrinogen C domain containing 1
	ILMN_2706906	Aldh1l1	aldehyde dehydrogenase 1 family, member L1
	ILMN_2678199	Rtn4rl2	reticulon 4 receptor-like 2
	ILMN_2674475	Tarm1	T cell-interacting, activating receptor on myeloid cells 1
	ILMN_1225873	Slc1a1	solute carrier family 1, member 1
	ILMN_2503987	Zbtb43	zinc finger and BTB domain containing 43
	ILMN_2625197	Ptprv	protein tyrosine phosphatase, receptor type, V
	ILMN_3064283	Pde4dip	phosphodiesterase 4D interacting protein
	ILMN_1238309	A2bp1	ataxin 2 binding protein 1
	ILMN_2666205	Dpp10	dipeptidylpeptidase 10
	ILMN_2698213	Als2cr12	amyotrophic lateral sclerosis 2 chromosome region, candidate 12
	ILMN_1239570	Elfn2	leucine rich repeat and fibronectin type III, extracellular 2
	ILMN_2671473	C1ql2	complement component 1, q subcomponent-like 2
	ILMN_2965669	Xlr4a	X-linked lymphocyte-regulated 4A	F
	ILMN_1217003	Nccrp1	non-specific cytotoxic cell receptor protein 1 homolog
	ILMN_2765834	Lrrc42	leucine rich repeat containing 42
	ILMN_2719513	Slc39a8	solute carrier family 39 (metal ion transporter), member 8
	ILMN_2731637	Etd	embryonic testis differentiation
	ILMN_1212836	Ptprc	protein tyrosine phosphatase, receptor type, C
	ILMN_2610406	Olfr470	olfactory receptor 470
	ILMN_3052890	Clm3	CMRF-35-like molecule 3
	ILMN_2855310	Mpl	myeloproliferative leukemia virus oncogene
	ILMN_3102795	C330021F23Rik
	ILMN_2741601	Ccbe1	collagen and calcium binding EGF domains 1
	ILMN_2603377	Dnase2b	deoxyribonuclease II beta
	ILMN_2872334	Rfpl4	ret finger protein-like 4
	ILMN_1259980	Pot1a	protection of telomeres 1A
	ILMN_1225422	LOC100048807	glycoprotein 1b, alpha polypeptide
	ILMN_2590082	Rgr	retinal G protein coupled receptor
	ILMN_1241214	Myh4	myosin, heavy polypeptide 4, skeletal muscle
	ILMN_2844699	Fbxw7	F-box and WD-40 domain protein 7
	ILMN_2962565	Bex6	brain expressed gene 6
	ILMN_2879232	Ssty2	spermiogenesis specific transcript on the Y 2
	ILMN_2613878	Prg2	proteoglycan 2, bone marrow
	ILMN_1256317	Prl3b1	prolactin family 3, subfamily b, member 1	E
	ILMN_2930660	BC061237
	ILMN_1242977	Hoxb5	homeo box B5
	ILMN_1236762	Gp5	glycoprotein 5
	ILMN_2996479	Iapp	islet amyloid polypeptide
	ILMN_2460662	Tnfsf4	tumor necrosis factor (ligand) superfamily, member 4
	ILMN_3163159	Gng5	guanine nucleotide binding protein
	ILMN_3160479	Olfr94	olfactory receptor 94
	ILMN_2427108	Zfp36l1	zinc finger protein 36, C3H type-like 1
	ILMN_3123855	Gpr133	G protein-coupled receptor 133
	ILMN_2952609	Sntn	sentan, cilia apical structure protein
	ILMN_3163270	Chrnb3	cholinergic receptor, nicotinic, beta polypeptide 3
	ILMN_2690884	Olfr556	olfactory receptor 556
	ILMN_1254019	Rhag	Rhesus blood group-associated A glycoprotein
	ILMN_2745513	Rhag	Rhesus blood group-associated A glycoprotein
	ILMN_2618935	Pdzk1ip1	PDZK1 interacting protein 1
	ILMN_2619200	Eraf	erythroid associated factor
	ILMN_2661982	Trim12c	tripartite motif-containing 12C
	ILMN_2931918	Nxpe2	neurexophilin and PC-esterase domain family, member 2
	ILMN_2743013	Ncf4	neutrophil cytosolic factor 4
	ILMN_3163353	Ankrd34a	ankyrin repeat domain 34A
	ILMN_2596704	Nmt2	N-myristoyltransferase 2	G
	ILMN_2471650	Psd	pleckstrin and Sec7 domain containing
	ILMN_2867735	9130008F23Rik
	ILMN_1228635	Pum2	pumilio 2
	ILMN_2995688	Gm5483
	ILMN_2798129	C6	complement component 6
	ILMN_2940312	BC117090
	ILMN_1229304	Dhx57	DEAH (Asp-Glu-Ala-Asp/His) box polypeptide 57
	ILMN_2662648	Svil	supervillin
	ILMN_2774563	Mug4	murinoglobulin 4
	ILMN_3160653	Hs3st6	heparan sulfate (glucosamine) 3-O-sulfotransferase 6
	ILMN_2466164	Wfdc1	WAP four-disulfide core domain 1
	ILMN_1215367	Grinl1a	glutamate receptor, ionotropic, N-methyl D-aspartate-like 1A
	ILMN_3155180	Itpr2	inositol 1,4,5-triphosphate receptor 2
	ILMN_2634484	Tectb	tectorin beta
	ILMN_1234797	Habp2	hyaluronic acid binding protein 2
	ILMN_3013787	Als2cr13	family with sequence similarity 117, member B
	ILMN_2602719	Zfp799	zinc finger protein 799
	ILMN_2604666	Esr1	estrogen receptor 1 (alpha)
	ILMN_2732508	Casp8ap2	caspase 8 associated protein 2
	ILMN_1258691	Pdzd3	PDZ domain containing 3
	ILMN_2976358	Olfr1133	olfactory receptor 1133
	ILMN_2794335	Sdccag8	serologically defined colon cancer antigen 8
	ILMN_2688089	Hfe2	hemochromatosis type 2
	ILMN_1243225	Pphln1	periphilin 1
	ILMN_2521511	Trdn	triadin
	ILMN_1258224	Gm156
	ILMN_2606043	Olfr599	olfactory receptor 599
	ILMN_2758840	Cpa5	carboxypeptidase A5
	ILMN_2749669	Nr1d1	nuclear receptor subfamily 1, group D, member 1
	ILMN_2594049	Gtlf3b	gene trap locus F3b
	ILMN_2730888	Slc22a8	solute carrier family 22 (organic anion transporter), member 8
	ILMN_2955351	Foxb1	forkhead box B1
	ILMN_1224967	Ltbp1	latent transforming growth factor beta binding protein 1
	ILMN_2647782	Tbx19	T-box 19
	ILMN_2679993	Olfr1341	olfactory receptor 1341
	ILMN_2683044	Dnajc2	DnaJ (Hsp40) homolog, subfamily C, member 2
	ILMN_2918229	Cypt6	cysteine-rich perinuclear theca 1
	ILMN_1228049	a	nonagouti
	ILMN_1233533	Olfr1168	olfactory receptor 1168
	ILMN_1250618	Zbtb38	zinc finger and BTB domain containing 38
	ILMN_2658704	Il1f9	interleukin 1 family, member 9
	ILMN_1227867	Klra7	killer cell lectin-like receptor, subfamily A, member 7
	ILMN_2632688	D930020B18Rik
	ILMN_1225722	Prl8a2	prolactin family 8, subfamily a, member 2
