# Supplementary material for: Restless Legs Syndrome-associated intronic common variant in Meis1 alters enhancer function in the developing telencephalon
Source: HighWire-hosted journal article supplement (doi:10.1101/gr.166751.113), 2014-03-18
Supplement: Supplemental_Table_8.xlsx [file Supplemental_Table_8.xlsx]

## Sheet: Tabelle1
SNP		primer:
		forward	reverse	extension
rs4430933	602	ACGTTGGATGGGATCCTCCTGTTGGAGATG	ACGTTGGATGGGATCCTCCTGTTGGAGATG	CTCCTATTTACCATTTCATCAAA
rs6724747	602	ACGTTGGATGATATGCATGGCAACAGTCAG	ACGTTGGATGCCCAGTGAAAAGGCAATTTG	CAGTCAGAAGCCCTGG
rs4544423	602	ACGTTGGATGCACCAGCTCATAAAGAAACC	ACGTTGGATGTCTGCCTCCCAGCTTAAATT	GAAACCACAGCAGAGC
rs6742861	602	ACGTTGGATGTAACTGCTGCACTGAGGTAT	ACGTTGGATGCCCTTTGCACACAGATGTAA	GGAAATGCTGCACTGAGGTATATGTAAC
rs6728018	602	ACGTTGGATGGAGGGGAAAGAATGTCTG	ACGTTGGATGACCATTGAGAAATCCATCAG	GGGGTAAATGAGGCAGTAATGGA
rs4480973	606	ACGTTGGATGCTCATTGAGCCCTGTGAGTC	ACGTTGGATGCCTGAGCACCTGTCATTTTG	ACGTTGGATGCCTGAGCACCTGTCATTTTG
rs11688599		ACGTTGGATGGAGACCCTATTTCTAAAAG	ACGTTGGATGGGGTTAGGATATCATCAGTG	AAGAAGAAGTAGATAAACAAATAAAT
rs6710341		ACGTTGGATGGGTAAATGATATACAATTGGC	ACGTTGGATGGTATATGGTGATGAGTGTTC	GGCTTCATGAAATAAAATGGT
rs12621948	612	ACGTTGGATGAAGGCCCTGTGTGTCAGGAT	ACGTTGGATGAGCTCATGATTAATGGCCGC	CCCGGTCAGGATGAGACCCCAGG
rs11693646	612	ACGTTGGATGTCCATCATTTTGATGATGCC	ACGTTGGATGAATAAATGAAGCCATTAAAC	TGCCAAATGAGGAACT
rs11678354	612	ACGTTGGATGACGAGCTCATCAATGGTTAT	ACGTTGGATGGAGAACTAAAAAAGAAGACAG	GGTGGCAGGATTTTGGAT
rs4433986		ACGTTGGATGAGTCAGAAGTGGCAATTCGC	ACGTTGGATGTTCTCGAGAGCACACTTTTC	GGGGCAGGGGACGAGCACCACA
rs4316931		ACGTTGGATGAGGAGTGTCACCTCAGGTTC	ACGTTGGATGATTACGGATGTGGGTGGAAG	CTTGTCACTCCCTCTAGTAATGTCACC
rs9789607		ACGTTGGATGCTACTGTGAGTTAGTTGACC	ACGTTGGATGGTTTAGTTCTTTGTTTCATC	CTGTTTTAACGTGTAAATGTGTAC
rs7603236		ACGTTGGATGTTGCCAAGTTTGAACCTCAC	ACGTTGGATGAGAATGAGGGCAACATTACC	GGGACCTCACAATTACTGGT
rs12469063	617	ACGTTGGATGATAGGCAGTAATTACAAGC	ACGTTGGATGATGAGCCCAGGCTAATTCAG	GCTTAAAGAGGTTTAGTGGTC
rs11681729	617	ACGTTGGATGAATGGTACATTTGGTGAGGA	ACGTTGGATGGCAGCACGAATTCTCCATCT	TGTCCATTTGGTGAGGAGATATTT
rs10865355		ACGTTGGATGCTCCAATAAAGTAAGGATCT	ACGTTGGATGTCTCCTTTTAGCTGACGTGC	AGTAAGGATCTTTTTCAAACTA
rs9789535		ACGTTGGATGGTCAGGTAAATAAAGTGAGC	ACGTTGGATGTCATCCTTCTCACTTAGTTC	GATTGAGCAAAATCTGGACT
rs2216125		ACGTTGGATGGCTGTTAACTACCTCAGAAG	ACGTTGGATGAAGTGAGAATGTGCCAGGCG	GGCTTTTGTGAGGAGTCATATAA
rs17625694		ACGTTGGATGAATGACATAGGTGTGGAAGG	ACGTTGGATGATAGTCTTAGTACAAAAAAC	TGTGGAAGGAAAAGTAGAA
rs17625724	622	ACGTTGGATGCATTCAGGCTATGTTCTGCG	ACGTTGGATGAAGAGACACTTTGTGCCTCC	GGACGGCTATGTTCTGCGACTGCAC
rs17625742	622	ACGTTGGATGGGAAAAAAGTATCCTAGATCA	ACGTTGGATGTTTTCCCCTCCTGCATTGAC	GGGGTCCTAGATCAATGTAATTGTCA
rs11678796	622	ACGTTGGATGGCAGTTAGAAAATATCCAGC	ACGTTGGATGAGCCAAGGGTGGAAATTTTG	ACGCCGTTAGAAAATATCCAGCTTTACA
rs12472245	622	ACGTTGGATGGAGAAGTCAAGGTGTTGACG	ACGTTGGATGCCAGCGAAAGGGAATAACTC	GACGATTGAAATAAGGATGA
rs997153	622	ACGTTGGATGTGGCACTTCCCAGATATACC	ACGTTGGATGCACTGTCTATGGGACTGTGG	CCAATCAACCTAATCACTT
rs10194077	622	ACGTTGGATGAGAGTGCTGAGCCTCCATAG	ACGTTGGATGAAGTAATTGGAACAAACTG	CCCTCGGCTGCCTAGCAATTATGCTGCA
rs13029520		ACGTTGGATGCACAAAAGTGATGTTGACCC	ACGTTGGATGAGTCACTTATGATCTTAGCC	GATGTTGACCCACTTTCTTCAAAT
rs10188003		ACGTTGGATGGATGGTGTGGCTTGGTATAG	ACGTTGGATGCCTTGCCCACTTCTCAGATT	TGGTATAGGGGTAGGAAG
rs2216120	629	ACGTTGGATGGGATGGTAAACCAAGCAAAG	ACGTTGGATGGGCAAACAAAAAACCTCAGC	CAAAGGCATACTACATCTAAATG
rs13019989	629	ACGTTGGATGGCAGGTAGAAATAGGCAAAC	ACGTTGGATGAGCAAAGGCATACTACATCT	CAAAAAACCTCAGCAGC
rs2300477	629	ACGTTGGATGGGGAGACCATCAATTTTGCG	ACGTTGGATGAAAACTGTCTCAACATCAGC	GCGTGCACATCTAGATTCAT
rs2192954		ACGTTGGATGGTCCCTCAAGTAACTAAAAG	ACGTTGGATGCAAATCAAACATGGTATTGTC	GGTGTAAGAGAGATTGTTTTTCTTT
rs62145814	631	ACGTTGGATGTCTGTGTTTCCCTTTCATT	ACGTTGGATGAGAAATCCAAGAAGGAAGAC	CTGTGTTTCCCTTTCATTTATTTATC
ss947429259	631	ACGTTGGATGTCTGTGTTTCCCTTTCATT	ACGTTGGATGAGAAATCCAAGAAGGAAGAC	CTGTGTTTCCCTTTCATTTATTTATC
rs3755517		ACGTTGGATGTTCCCTTGAGAATTGAAGTG	ACGTTGGATGTATACCGCACCTGTTACTCC	GAGAATTGAAGTGTAACCTAC
rs2300478		ACGTTGGATGGCATTTCTCTGACCAGATAC	ACGTTGGATGGCACAACTTGTTGCAAATCC	CCCCATGACCAGATACTTACAGAC
rs2300480		ACGTTGGATGGAAATGCAGGGACAGGTCG	ACGTTGGATGAGGACACTGTCGCCCAAATC	GGACAGGTCGCTGCAATCAAAACA

## Sheet: Tabelle2
HCNR_602_6_66603332_E	CAGTCAGAAGCCCTGG	300 pmol/µl	MALDI
HCNR_602_6_66603332_F	ACGTTGGATGATATGCATGGCAACAGTCAG	50 pmol/µl
HCNR_602_6_66603332_R	ACGTTGGATGCCCAGTGAAAAGGCAATTTG	50 pmol/µl
HCNR_602_8_66603806_E	ggggtAAATGAGGCAGTAATGGA	300 pmol/µl	MALDI
HCNR_602_8_66603806_F	ACGTTGGATGGAGGGGAAAGAATGTCTG	50 pmol/µl
HCNR_602_8_66603806_R	ACGTTGGATGACCATTGAGAAATCCATCAG	50 pmol/µl
HCNR_602_3_66602608_E	cttgTCACTCCCTCTAGTAATGTCACC	300 pmol/µl	MALDI
HCNR_602_3_66602608_F	ACGTTGGATGAGGAGTGTCACCTCAGGTTC	50 pmol/µl
HCNR_602_3_66602608_R	ACGTTGGATGATTACGGATGTGGGTGGAAG	50 pmol/µl
HCNR_1_2_66617888_E	GCTTAAAGAGGTTTAGTGGTC	300 pmol/µl
HCNR_1_2_66617888_F	ACGTTGGATGATAGGCAGTAATTACAAGC	50 pmol/µl
HCNR_1_2_66617888_R	ACGTTGGATGATGAGCCCAGGCTAATTCAG	50 pmol/µl
HCNR_631_1-2_66631639_E	CTGTGTTTCCCTTTCATTTATTTATC	300 pmol/µl	MALDI
HCNR_631_1-2_66631639_F	ACGTTGGATGTCTGTGTTTCCCTTTCATT	50 pmol/µl
HCNR_631_1-2_66631639_R	ACGTTGGATGAGAAATCCAAGAAGGAAGAC	50 pmol/µl
